# Supplementary material
Source: MDPI journal article supplement (https://www.mdpi.com/2073-4441/12/12/3557)

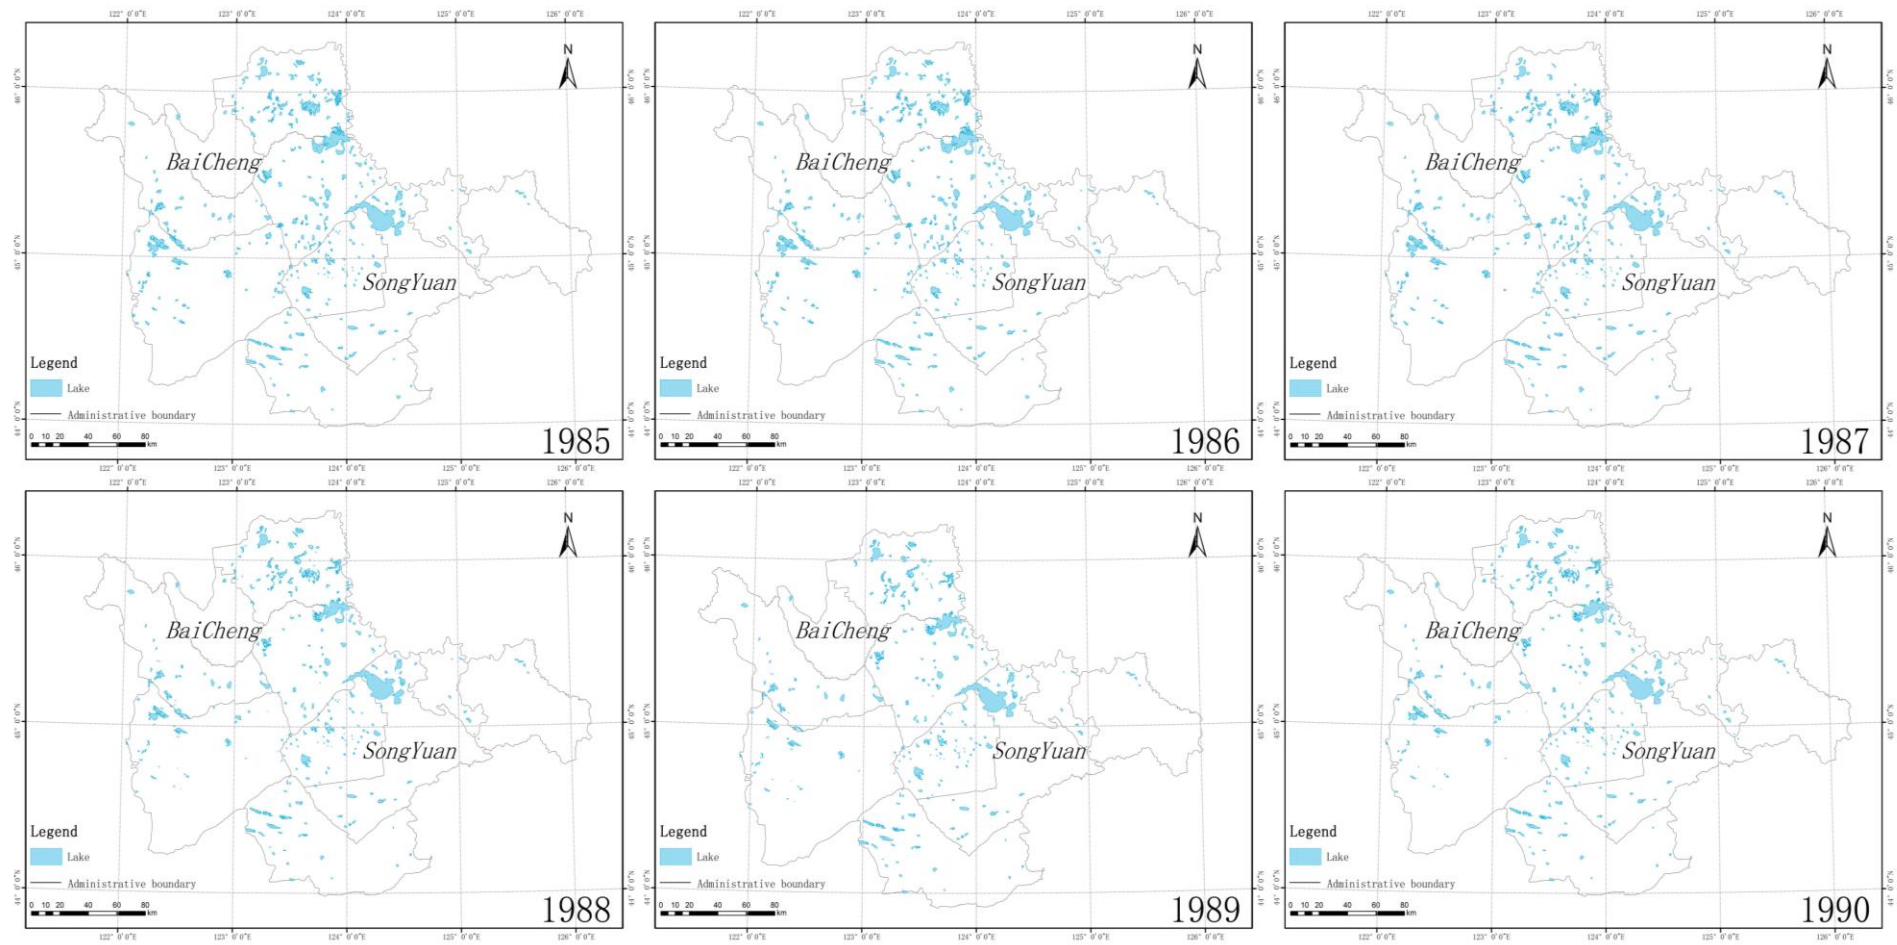

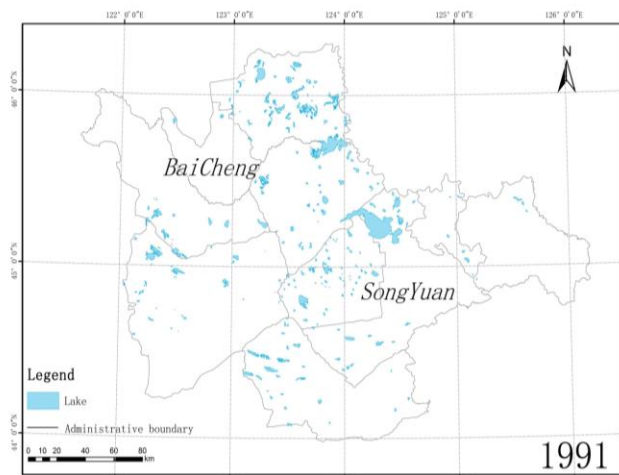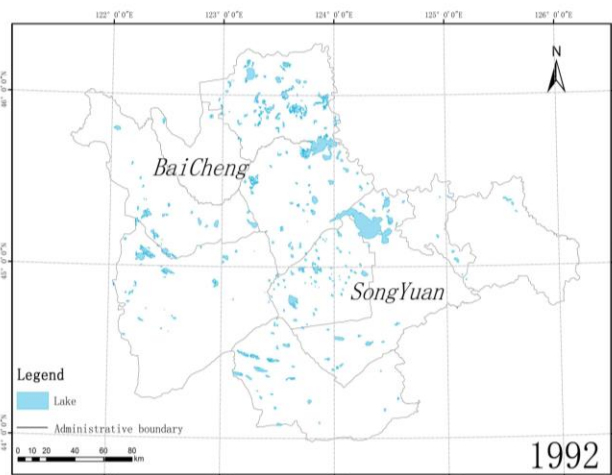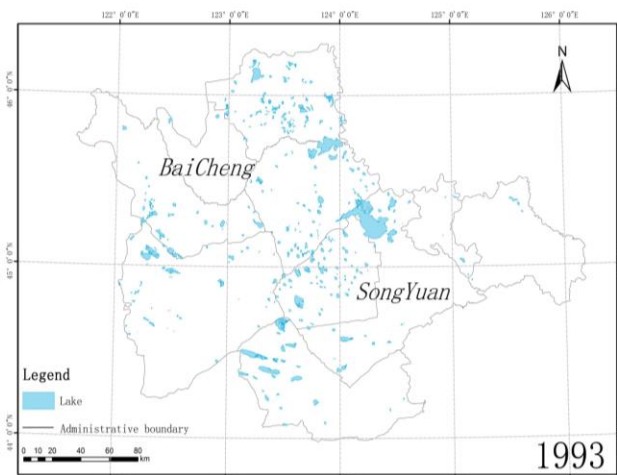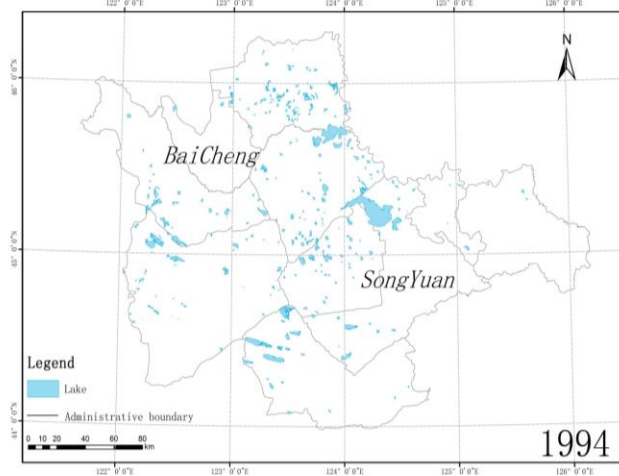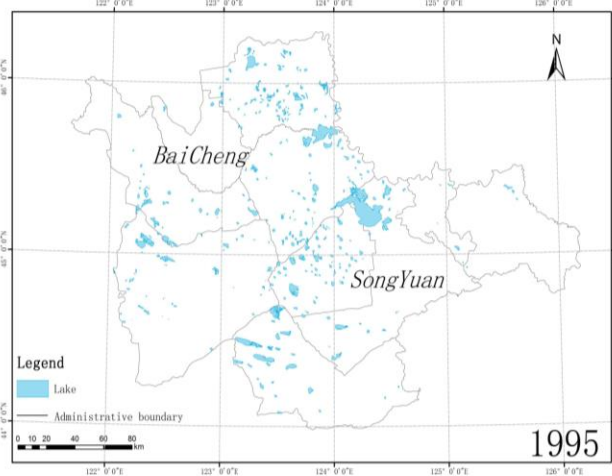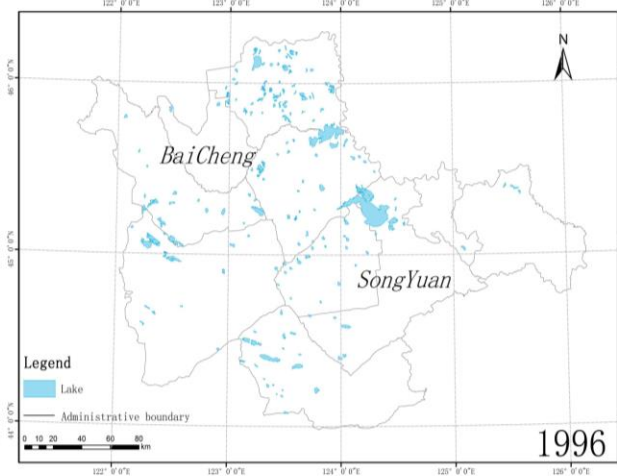

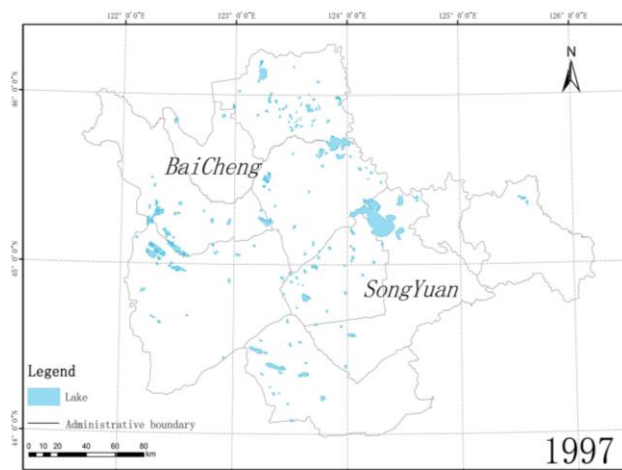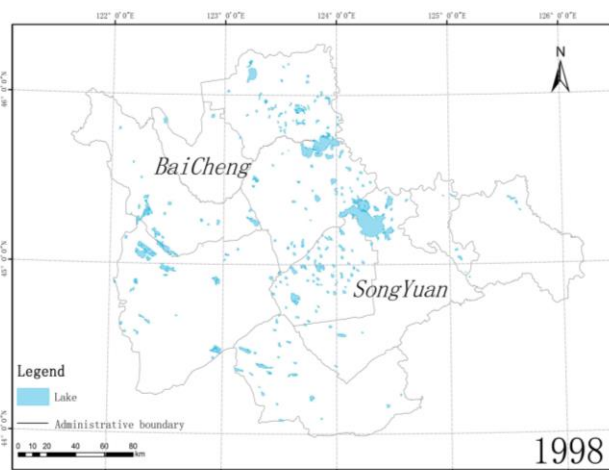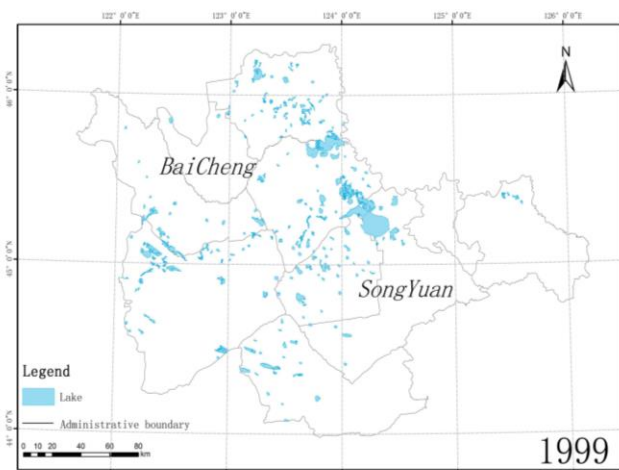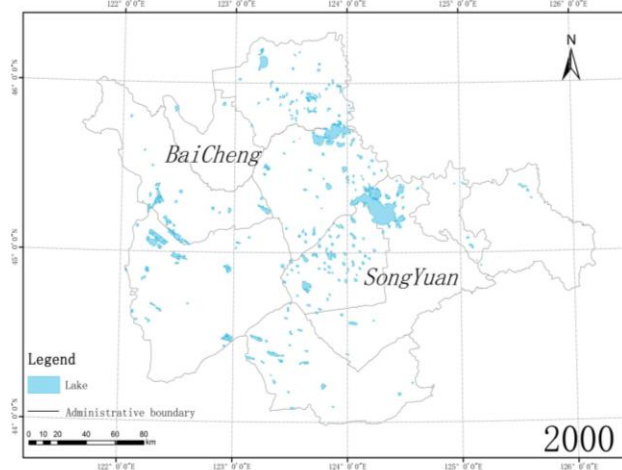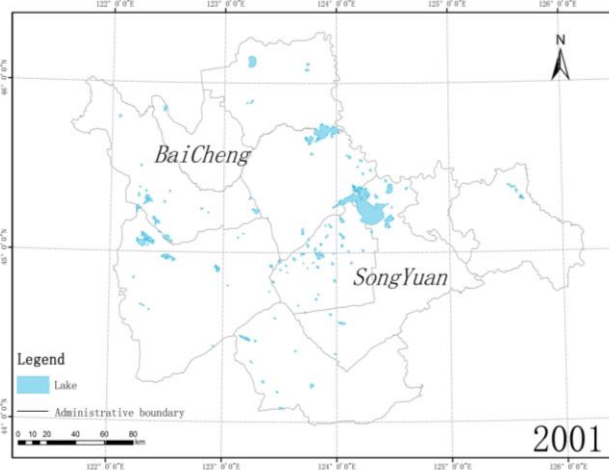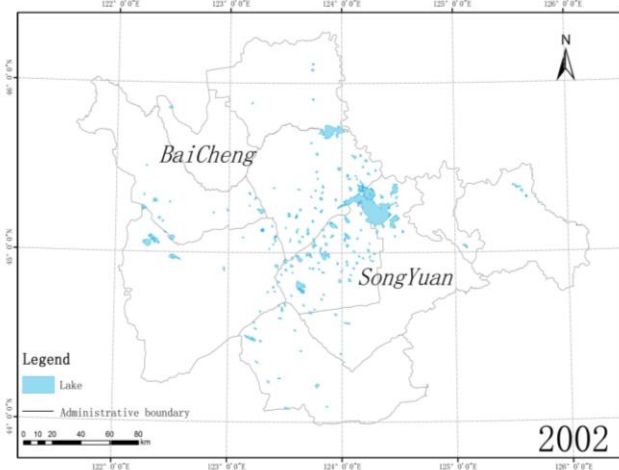

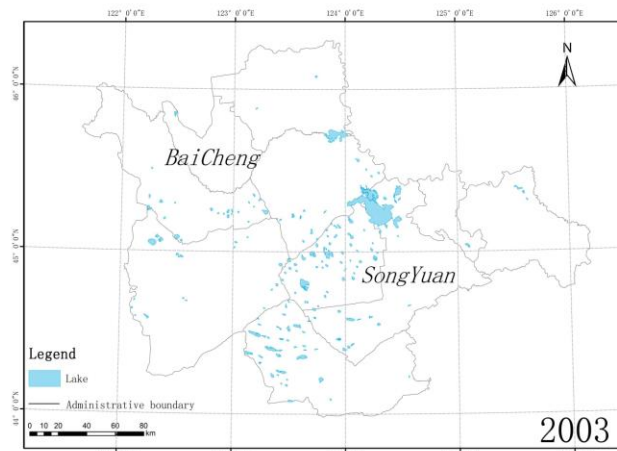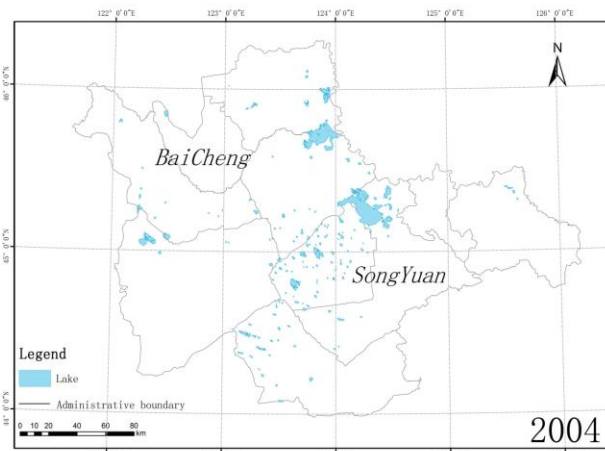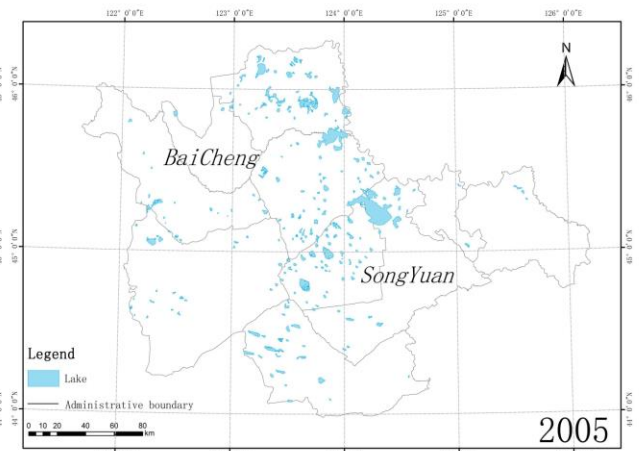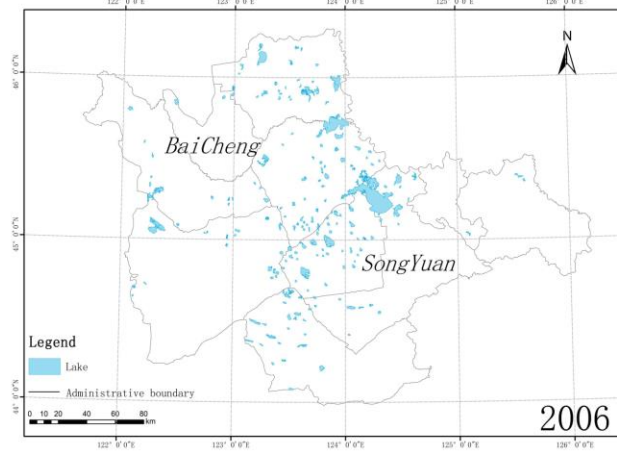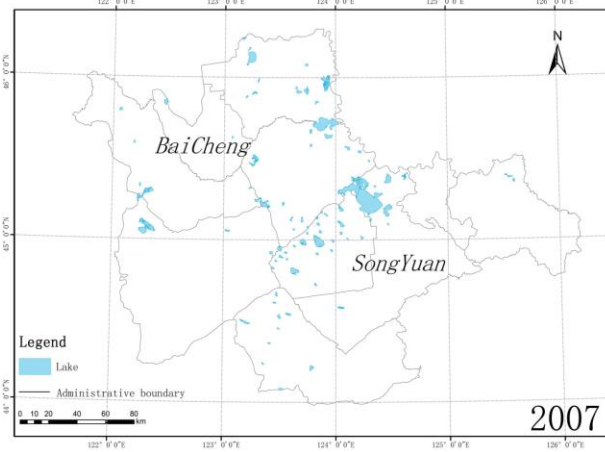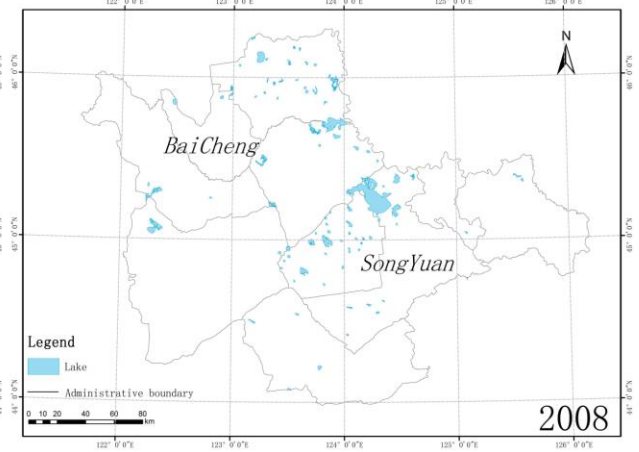



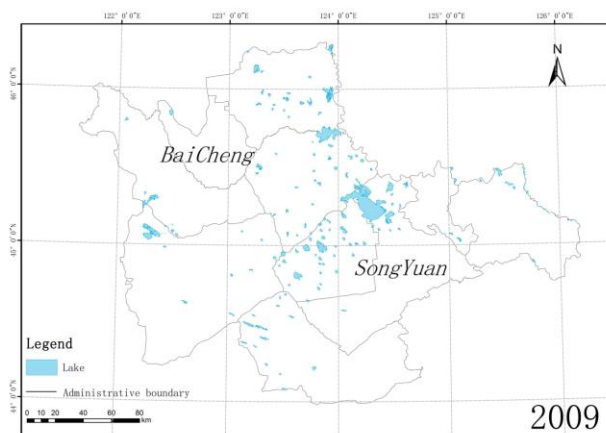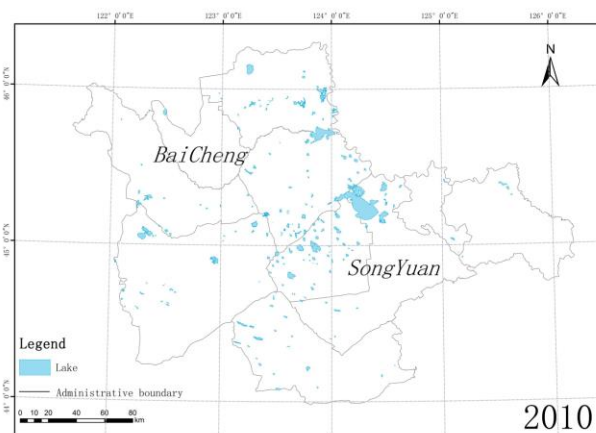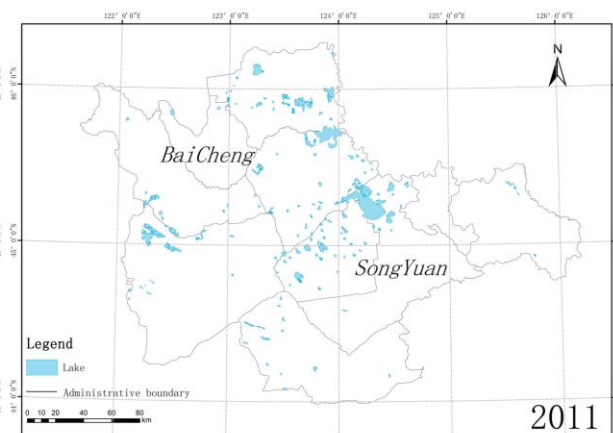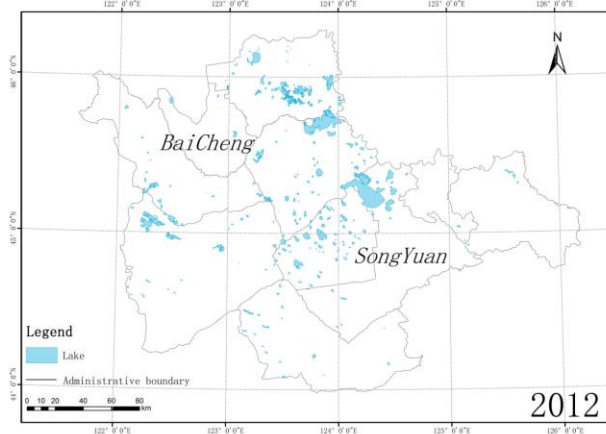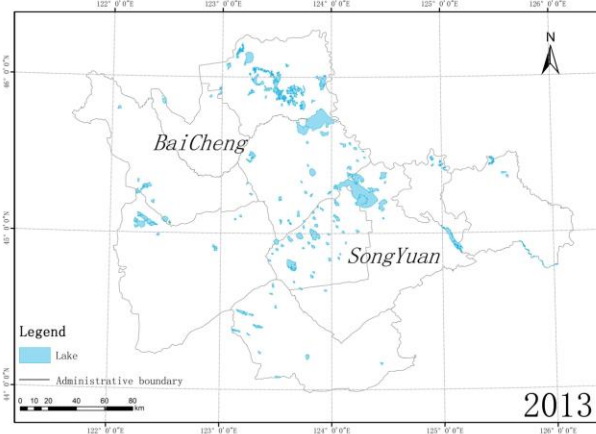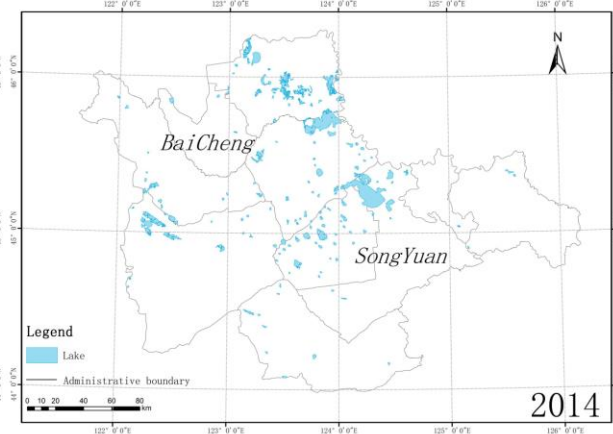

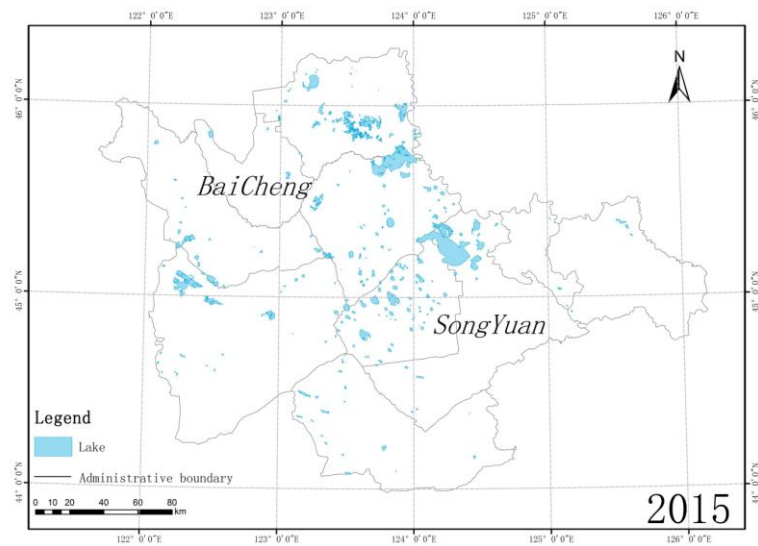

**Figure S1.** Lake vector diagram in the study area from 1985 to 2015.

Supplement: s1 [file s1]
